# Supplementary material for: Hyperunstable matrix proteins in the byssus of Mytilus galloprovincialis
Source: Oxford University Press journal article supplement (doi:10.1242/jeb.029686), 2009-06-26
Supplement: jeb029686-sup-029686-figs2.pdf [file jeb029686-sup-029686-figs2.pdf]

## A

```

seq C1      GNIYGHGNIYGYGYNGYNGKTNIFVNKSGYGYNNGGFGNGYGYGN-----IYGYGYN
seq C2      -----GYNGYNGKTNIFVNKSGYGYNNGGFGNGYGYGNLYGYGNIYGYGYN
seq F3T7    -----

```

```

seq C1      GYGNIYGYGYNGYNGKTNIIVNKSGYGYNNDGYGNGYGYGNRYGY-----GNIYVYG
seq C2      GYGNIYGYGYNGYNGKTNIIVNKSGYGYNNDGYGNGYGYGNRYGYGNRYGYGNIYVYG
seq F3T7    -----GYGYGNRYGY-----GNIYVYG
                                     *****          *****

```

```

seq C1      NNGYGNGYGYGYNGYRNGKTNIIVNKSGYGYHNDGYGNIKHKLFYKY
seq C2      NNGYGNGYGYGYNGYRNGKTNIIVNKSGYGYHNDGYGNIKHKLFYKY
seq F3T7    NNGYGNGYGYGYNGYRNGKTNIIVNKSGYGYHNDGYGNIKHKLFYKY
*****

```

## B

```

3' UTR  taatgaggagtaagactttccaattttgaaatgaaacaagaatataattggctacacag
        atatztatgttttcttttgcccaataaaacaattcaaagcgtcaaaaaaaaaaaaaaaaa

```
