# Supplementary material for: Hyperunstable matrix proteins in the byssus of Mytilus galloprovincialis
Source: Oxford University Press journal article supplement (doi:10.1242/jeb.029686), 2009-06-26
Supplement: jeb029686-sup-029686-figs3.pdf [file jeb029686-sup-029686-figs3.pdf]

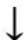

TMP-1a MVQLTQHCLVLLLFALANGS SYGNGKTTKIVVNKDNGYGYDYDDGYGNDKTTKIVVNKGN  
TMP-1b QHCLVLLLFALANGS SYGNGKTTKIVVNKDNGYGYDYDDGYGNDKTTKIVVNKGN

\*\*\*\*\*

TMP-1a GYGYDHGNYGNGKTKIVVNKGS GYGYNNGY GNGYGYGYNGYRNGKTNI IVNKGSGY GNG  
TMP-1b GYGYDHGNYGNGKTKIVVNKGS GYGYNNGY GNGYGYGYNGYRNGKTNI IVNKGSGY GNG

\*\*\*\*\*

TMP-1a YNGY GNGYGYGNRYGYGNRYGYRNI YGYGNRYGYGYNGYRNGKTNI IVNKGSGY GNGYNG  
TMP-1b YNGY GNGYGYGNRYGYGNRYGYRNYGYGNRYGYGYNGYRNGKTNI IVNKGSGY GNGYNG

\*\*\*\*\* \*\*\*\*\*

TMP-1a YGNGYGYGNIYGYGNRYGYGYNGYRNGKTNI IVNKGSGYGYNNNGY GNGYGYGNIYGYGN  
TMP-1b YGNGY GNG-----YNGY GNGYGYGNIYGYGN

\*\*\*\*\*

\*\*\*\*\*

TMP-1a RYGYGYNGYRNGRTNI IVNKGSGYGYNNGGY GNGY . . .

TMP-1b RYGYGYNGYRNGKTNI IVNKGSGYGYNNGGY GNGY . . .

\*\*\*\*\* \*\*\*\*\*
