# Supplementary figures and images for: Hyperunstable matrix proteins in the byssus of Mytilus galloprovincialis
Source: Oxford University Press journal article supplement (doi:10.1242/jeb.029686), 2009-06-26

A

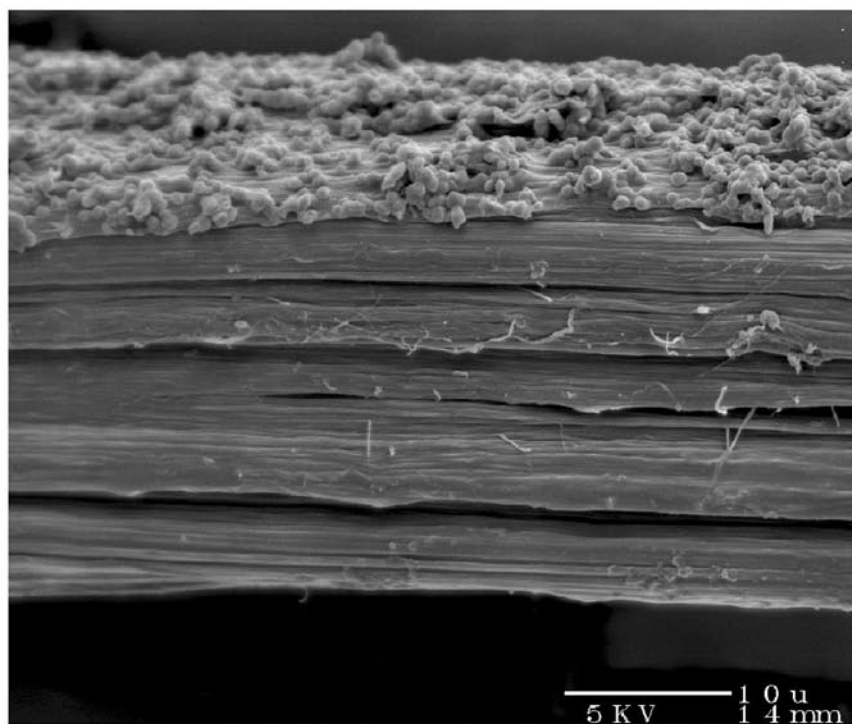

B

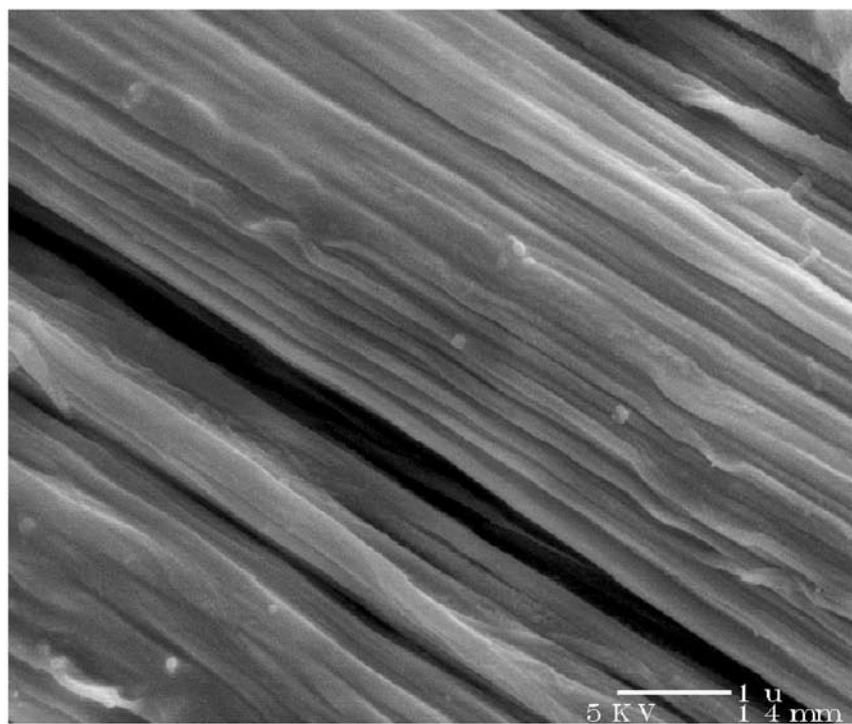

Supplement: jeb029686-sup-029686-figs1.pdf [file jeb029686-sup-029686-figs1.pdf]
